# Supplementary material for: New microporous coordination polymer affording guest-coordination sites at channel wallsElectronic supplementary information (ESI) available: Fig. S1: XRPD patterns of (a) simulation, (b) 2 and (c) 3. See http://www.rsc.org/suppdata/cc/b1/b108695b/
Source: Royal Society of Chemistry journal article supplement (doi:10.1039/b108695b), 2002-01-07
Supplement: b108695b.doc [file b108695b.doc]

**Electronic supplementary information**


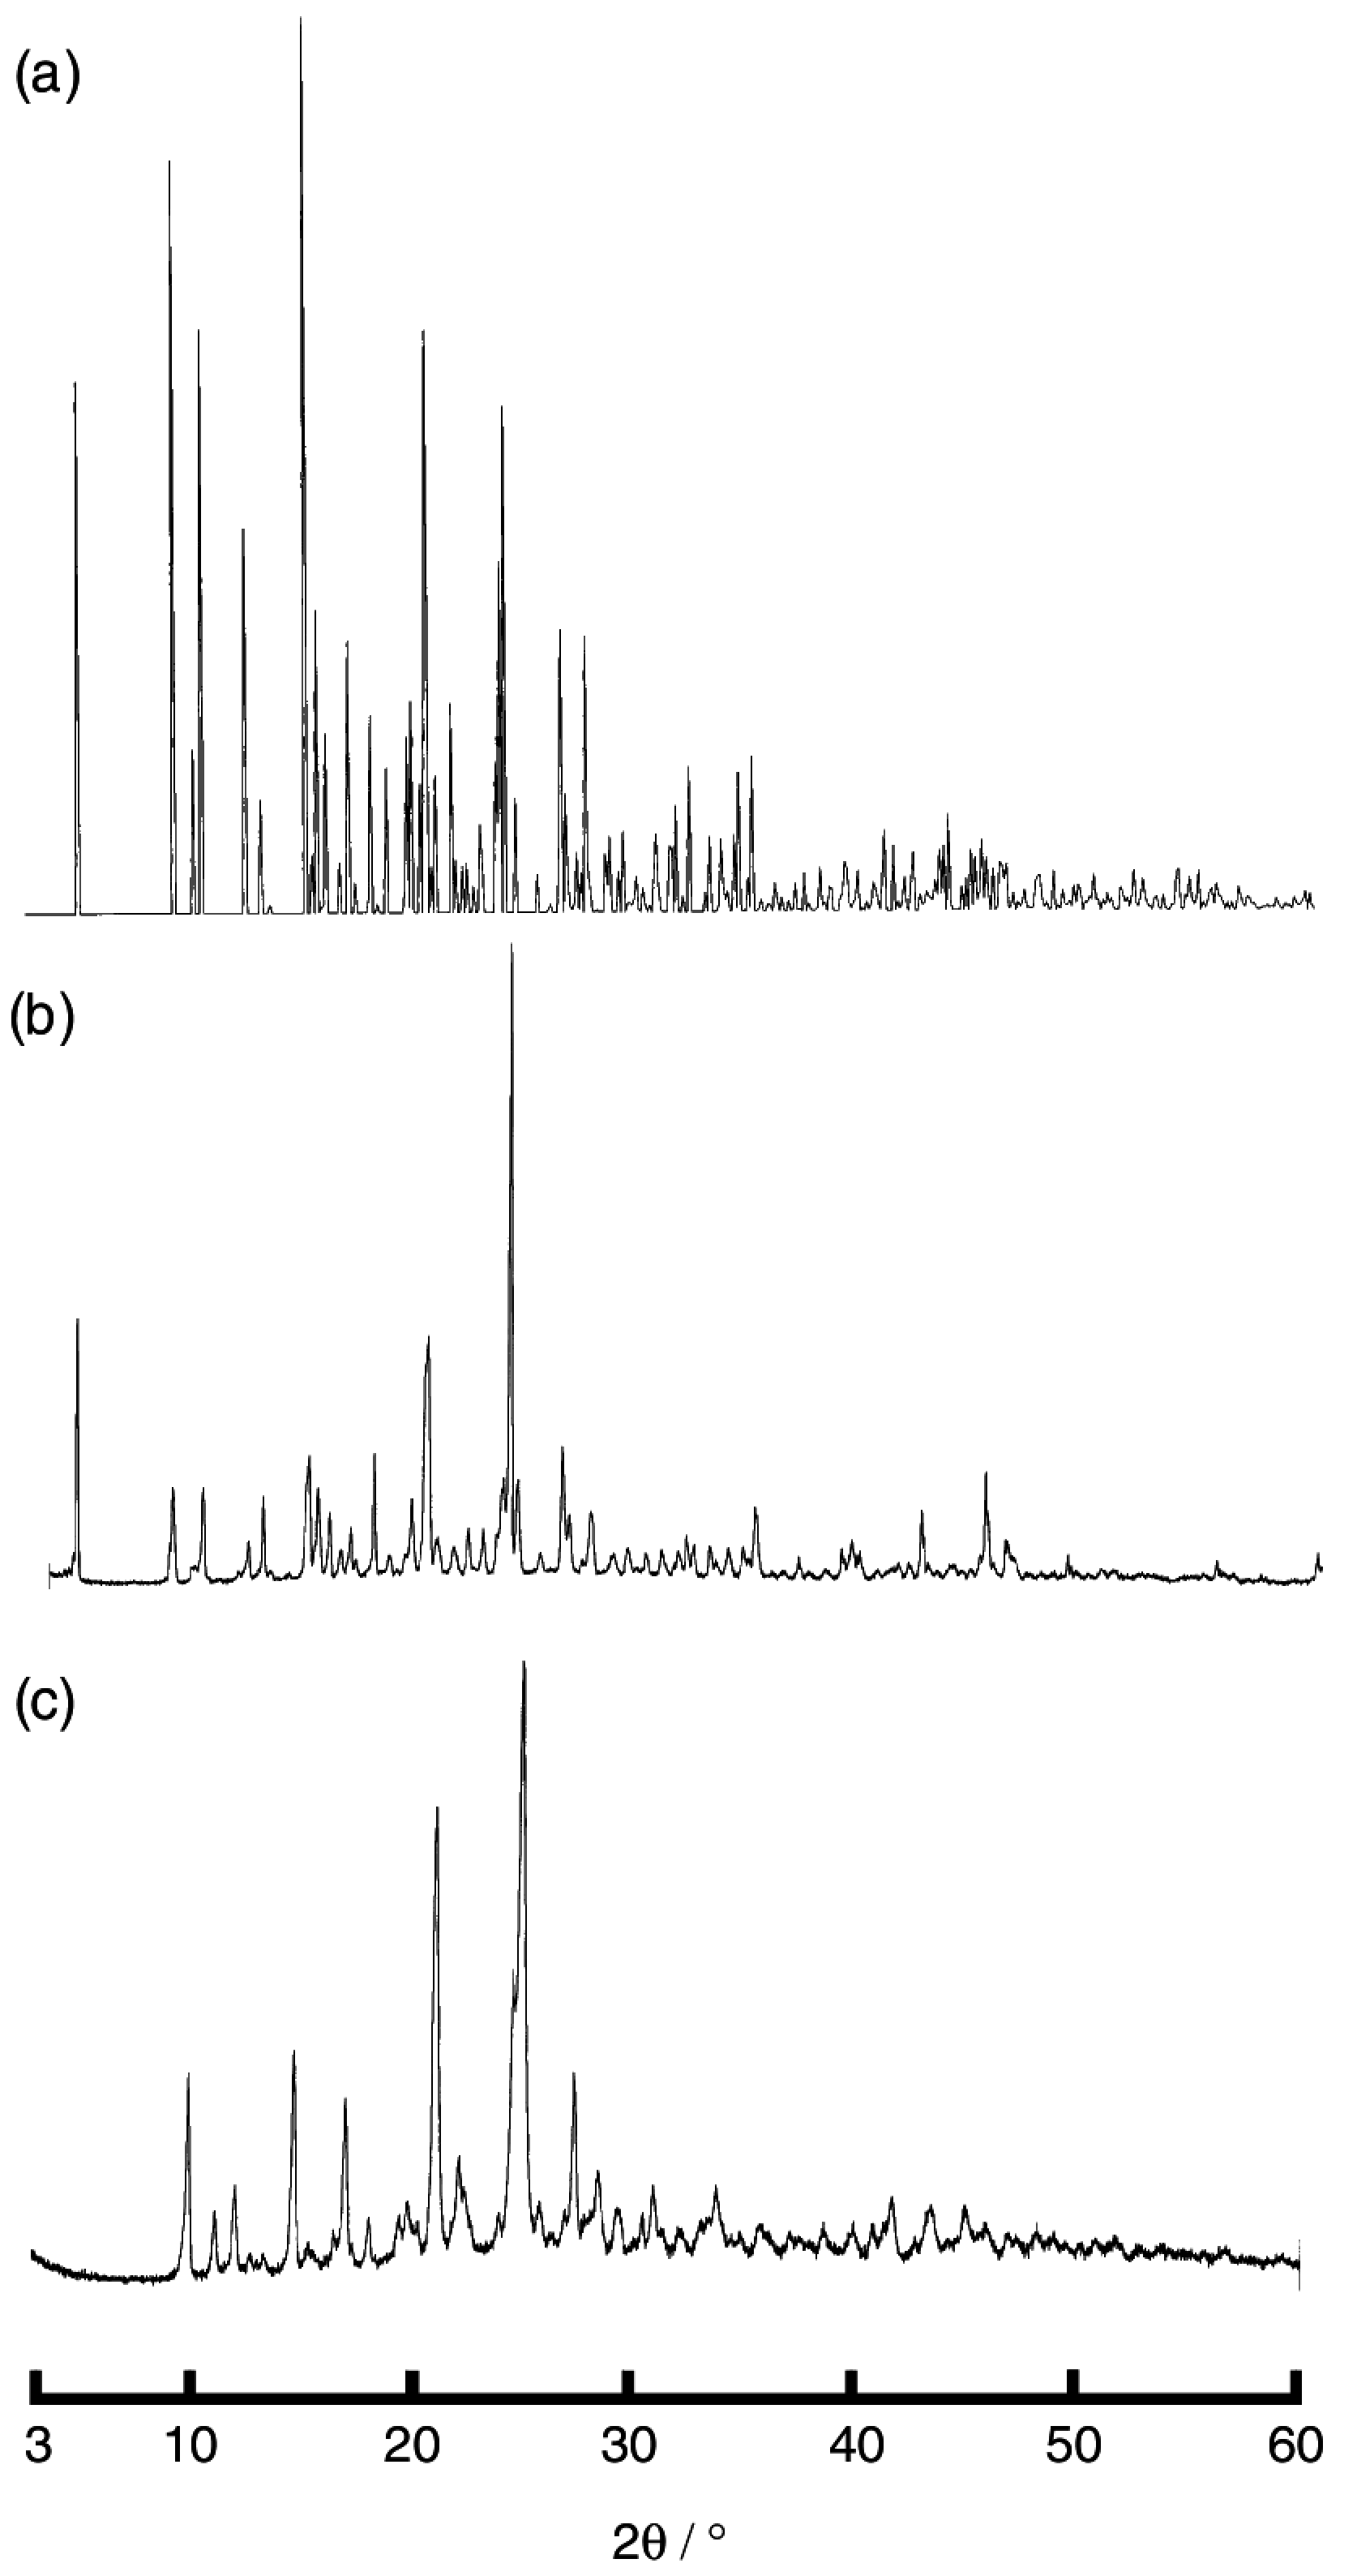


**Figure S1.** XRPD data : (a) simulation pattern of **2**, (b) observed pattern of **2**, and (c) observed pattern of **3** replaced by H2O molecules.
